# Supplementary material
Source: PubMed Central journal article supplement (PMC2689979)
Supplement: pp.109.136853_1.pdf [file pp.109.136853_1.pdf]

**Figure S1**

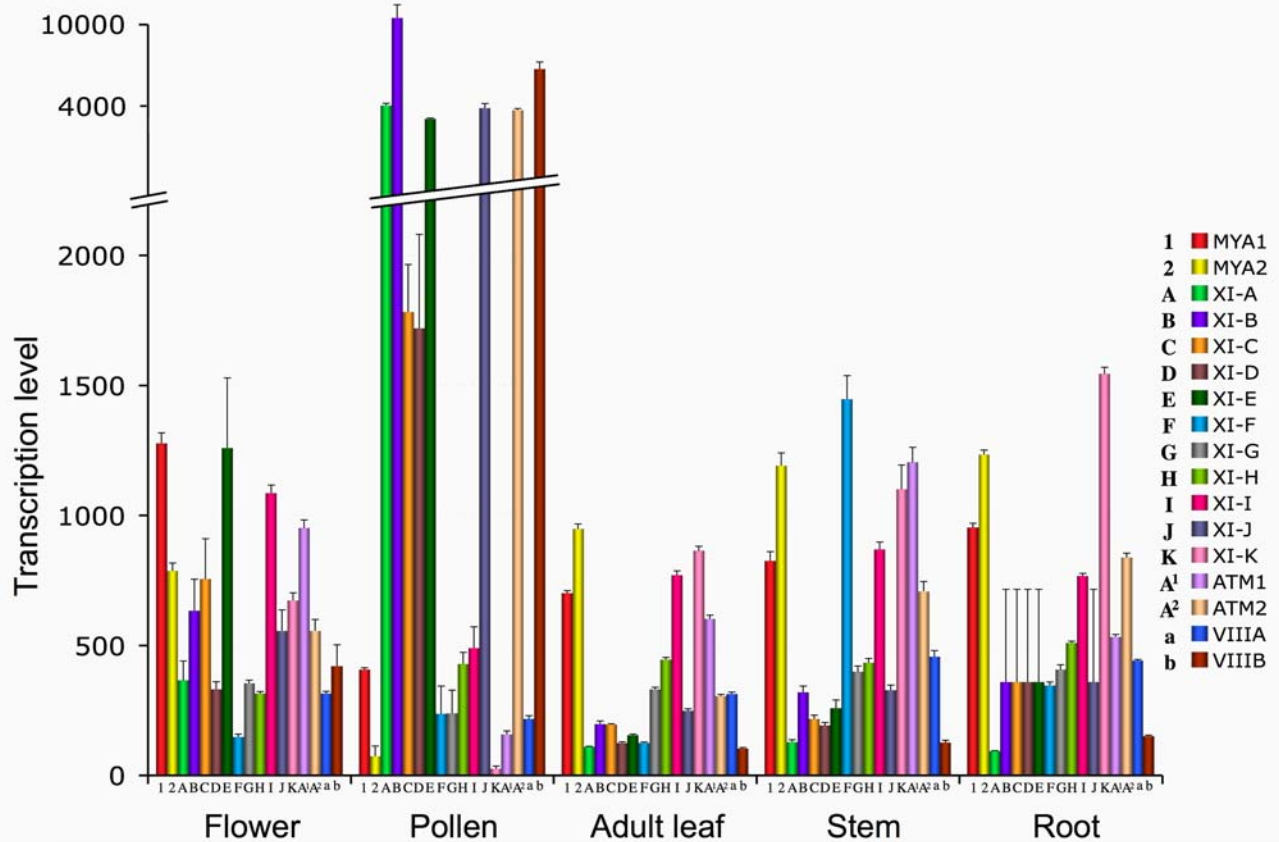

Figure S1: Transcription profile of Arabidopsis myosin family members according to Genvestigator in arbitrary units.
