# Supplementary material
Source: PubMed Central journal article supplement (PMC2689979)
Supplement: pp.109.136853_2.pdf [file pp.109.136853_2.pdf]

# Figure S2

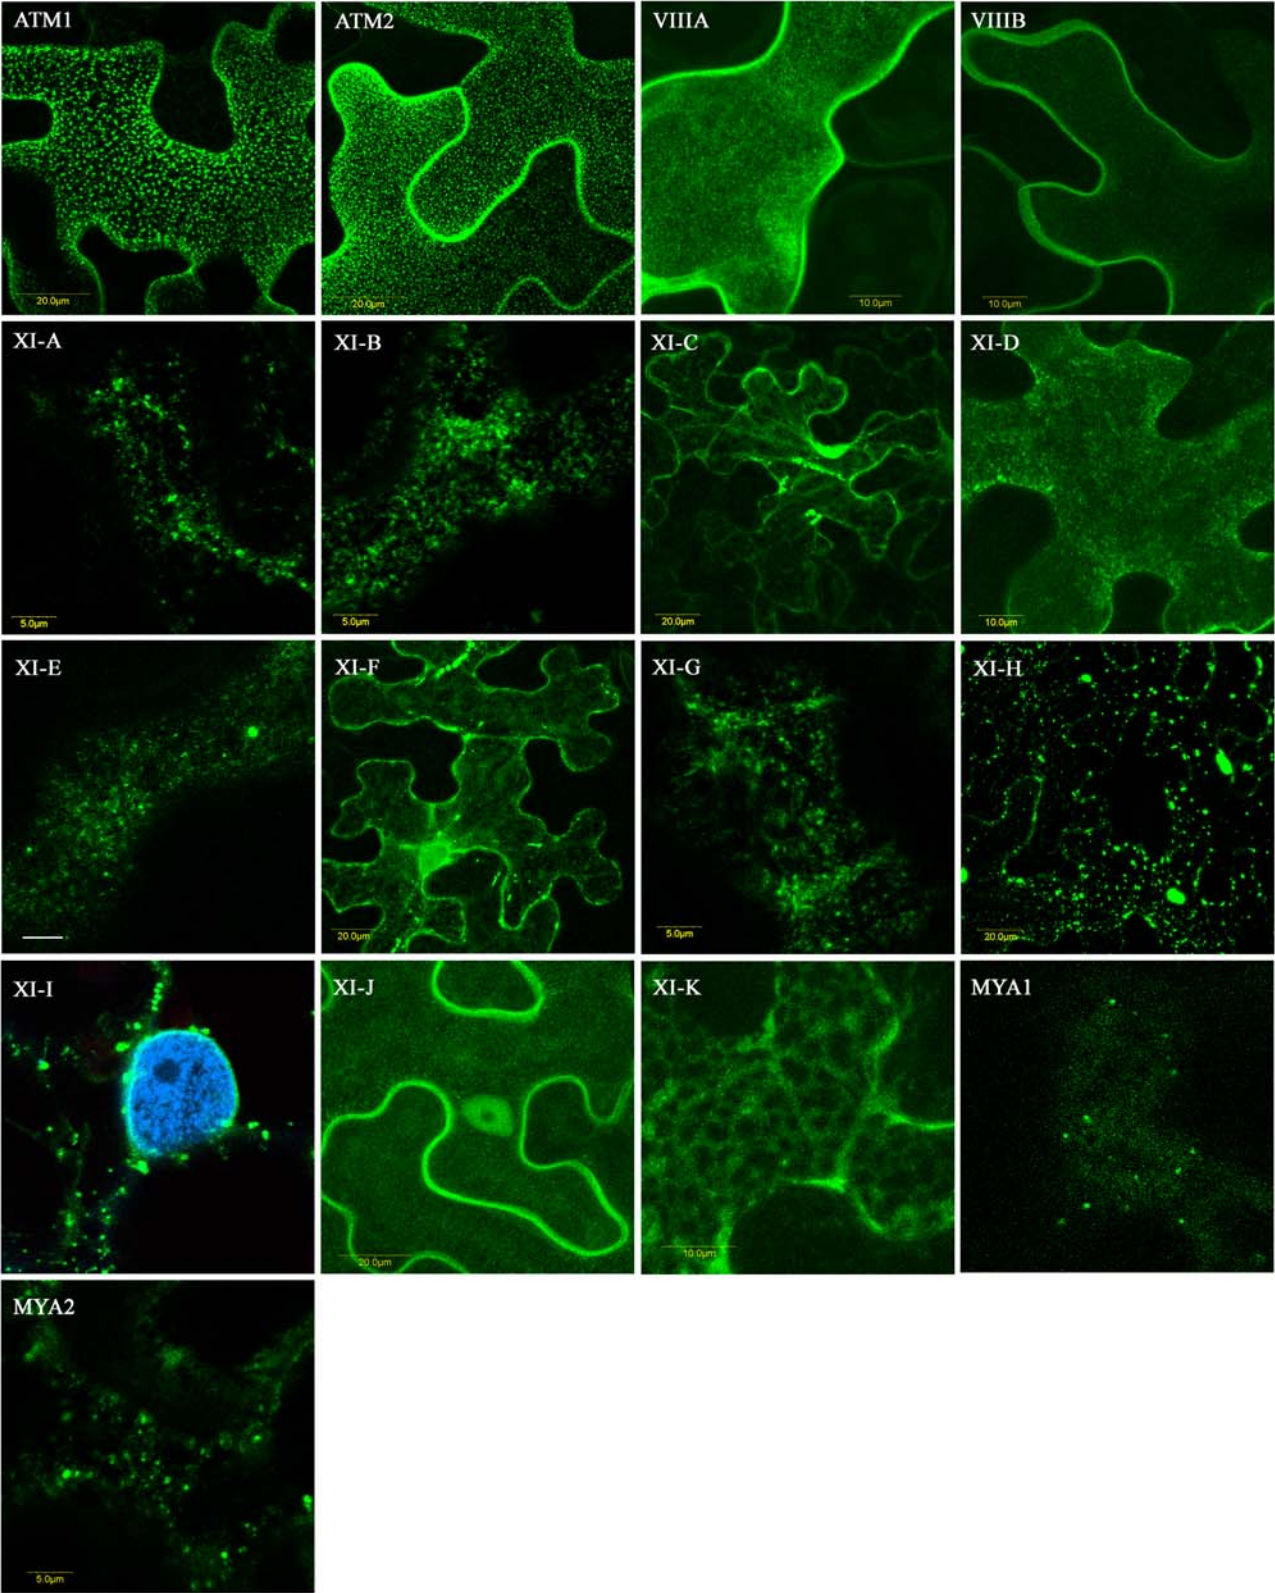

Figure S2. The subcellular localization of eGFP-IQ-tail fusions of all Arabidopsis myosins in *N. benthamiana* leaf epidermal cells.
