# Supplementary material
Source: PubMed Central journal article supplement (PMC2689979)
Supplement: pp.109.136853_4.pdf [file pp.109.136853_4.pdf]

Figure S3 B

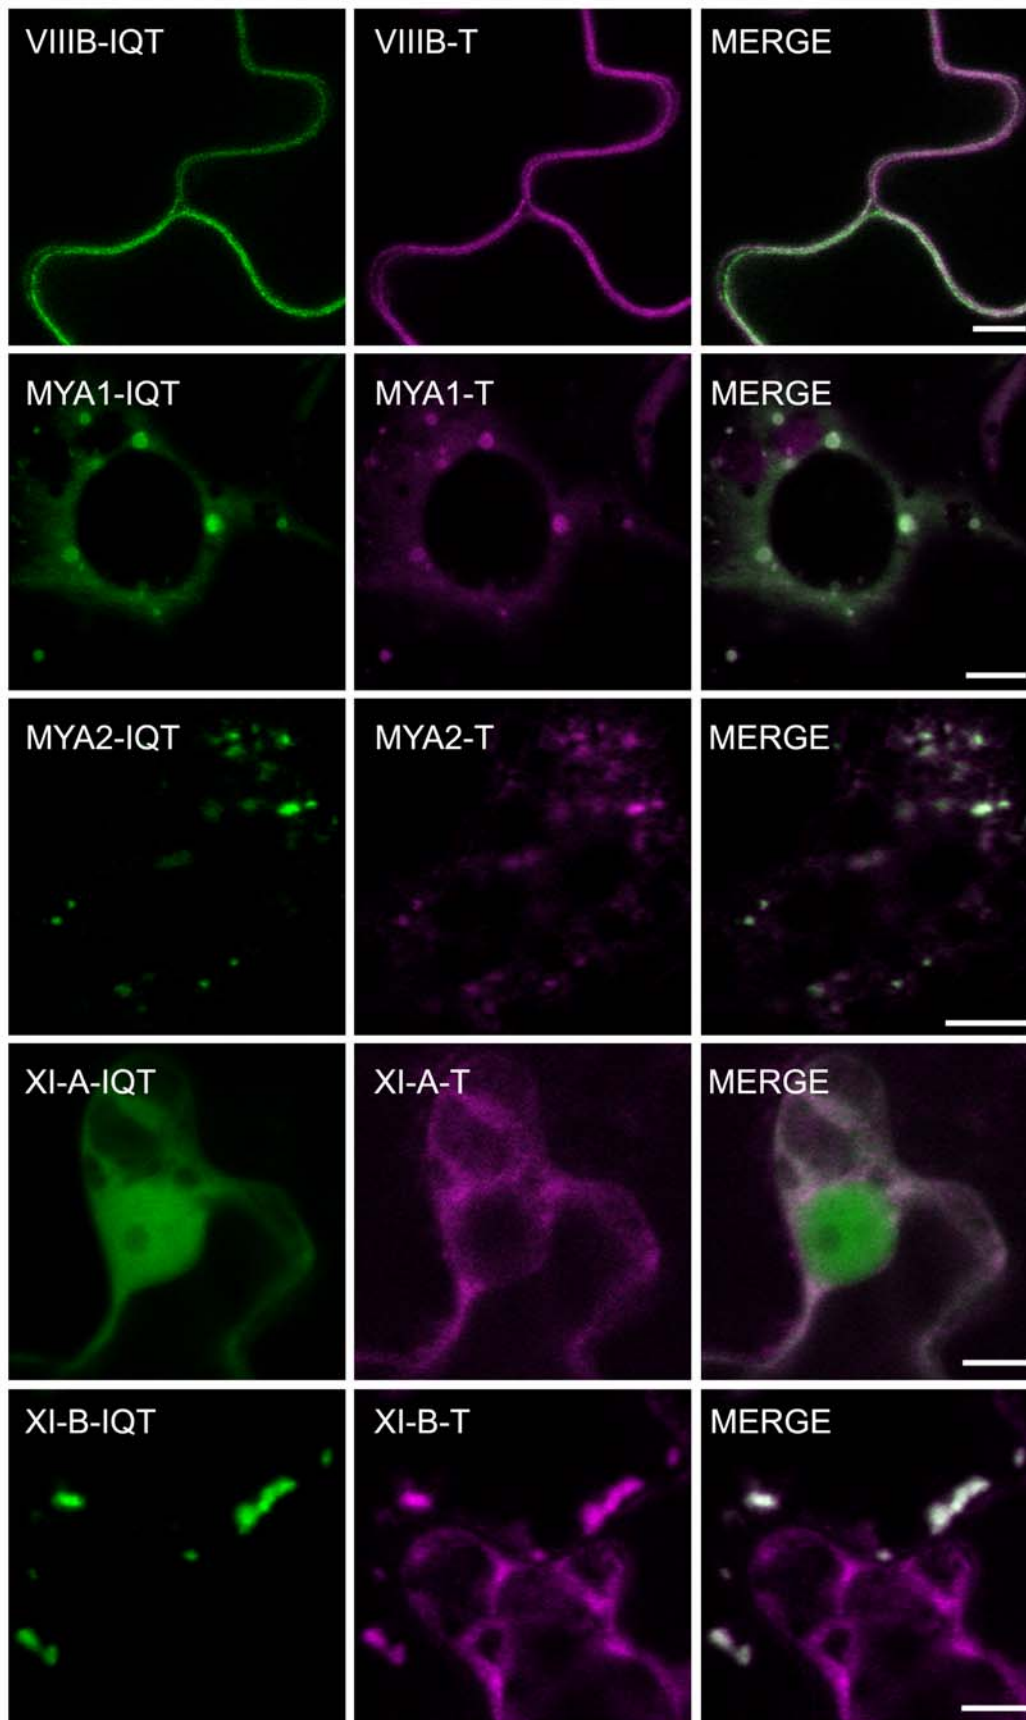

Figure S3: (A-D) - Comparative subcellular localization of mRFP-tail and eGFP-IQ-tail myosin fusions in *N. tabacum*. mRFP-myosin tail (magenta, myosin-T) and eGFP-myosin IQ tail (green, myosin-IQT) fusions were coexpressed in *N. tabacum* leaf epidermal cells. The merged image indicates that the majority of the tail and IQtail fusions of the same myosin gene colocalize to the same subcellular structures (white). Scale bar = 5  $\mu$ m.
